# Supplementary material for: Facile synthesis of crumpled nitrogen-doped porous carbon nanosheets with ultrahigh surface area for high-performance supercapacitors
Source: Royal Society of Chemistry journal article supplement (doi:10.1039/d2na00949h), 2023-01-01
Supplement: d2na00949h1.pdf [file d2na00949h1.pdf]

## Electronic Supplementary Information

# Facile synthesis of crumpled nitrogen doped porous carbon nanosheets with ultrahigh surface area for high performance supercapacitors

Chong Chen,<sup>\*a</sup> Jiacan Shao,<sup>b</sup> Yaru Zhang,<sup>a</sup> Li Sun,<sup>a</sup> Keying Zhang,<sup>a</sup> Hongyan Wang<sup>a</sup> and Guang

Zhu<sup>\*a,b</sup>

<sup>a</sup> Key Laboratory of Spin Electron and Nanomaterials of Anhui Higher Education Institutes, School of Chemistry and Chemical Engineering, Suzhou University, Suzhou 234000, People's Republic of China

<sup>b</sup> School of Mechanics and Photoelectric Physics, Anhui University of Science and Technology, Huainan 232001, P. R. China

\* Corresponding author.

E-mail addresses: szxychenchong@163.com (Chong Chen), guangzhu@ahszu.edu.cn (Guang Zhu)

## Characterizations

The morphology and microstructure of NPCNS, CNPCNS-700, CNPCNS-800 and CNPCNS-900 were characterized by scanning electron microscopy (SEM, JSU1510) and transmission electron microscopy (TEM, Jem-2100F Jeol). The thickness of NPCNS and CNPCNS-800 was detected by Bruker MultiMode-8 atomic force microscopy (AFM). Structure of NPCNS, CNPCNS-700, CNPCNS-800 and CNPCNS-900 were analyzed by X-ray diffraction (XRD, SmartLab3KW) and Raman spectrometer (XPLORA PLUS). The chemical composition and states of NPCNS, CNPCNS-700, CNPCNS-800 and CNPCNS-900 were analyzed by X-ray photoelectron spectroscopy (XPS, Thermo Escalab 250Xi). Nitrogen adsorption-desorption isotherms of NPCNS, CNPCNS-700, CNPCNS-800 and CNPCNS-900 were tested by an ASAP-2020 at 77 K.

## Electrochemical measurements

The three-electrode and two-electrode systems were used to evaluate the capacitance performances of NPCNS, CNPCNS-700, CNPCNS-800 and CNPCNS-900 at room temperature. To prepare the electrodes, active materials (80 wt%), acetylene black (15 wt%) and polytetrafluoroethylene binder (5 wt%) were mixed together using ethanol to make a slurry, which was coated onto uniform thickness nickel foam sheets (1.0 cm × 1.0 cm) under 10 MPa followed by drying at 100 °C for 12 h. The loading weight of the active materials in electrode was about 1 mg cm<sup>-2</sup>. For the three-electrode system, NPCNS or CNPCNS electrode and Pt foil electrode were used as the working and counter electrodes, and the Hg/HgO served as the reference electrode. For the two-electrode system, the symmetric supercapacitor was assembled by two identical electrodes as a 2025 stainless steel coin cell, using glass fiber as the separator, and 1-ethyl-3-methylimidazolium tetrafluoroborate (EMIMBF<sub>4</sub>) were used as the electrolyte, respectively. The cyclic voltammetry (CV), galvanostatic charge-discharge (GCD) and electrochemical impedance spectra (EIS) measurements were measured by a CHI660E

electrochemical workstation (ChenHua, Shanghai). The EIS measurements were conducted in the frequency ranging from 100 kHz to 10 mHz with a perturbation amplitude of 5 mV versus the open circuit potential.

For the three electrode systems, the gravimetric capacitance  $C$  ( $\text{F g}^{-1}$ ) was calculated according to the galvanostatic tests based on the equation:

$$C = \frac{I\Delta t}{m\Delta V} \quad (1)$$

where  $I$  (A) is the discharge current;  $\Delta t$  (s) is the discharge time;  $\Delta V$  (V) is the potential window; and  $m$  (g) is the mass of the active materials.

For the two electrode systems, the gravimetric capacitance  $C$  ( $\text{F g}^{-1}$ ) was calculated from the galvanostatic tests based on the equation:

$$C = \frac{4I\Delta t}{m\Delta V} \quad (2)$$

where  $I$  (A) is the discharge current;  $\Delta t$  (s) is the discharge time;  $\Delta V$  (V) is the potential window;  $m$  (g) is the total mass of the active materials on the two electrodes.

Energy density  $E$  ( $\text{Wh kg}^{-1}$ ) and power density  $P$  ( $\text{W kg}^{-1}$ ) of the symmetric supercapacitors were calculated from the equations:

$$E = \frac{1}{8} C \Delta V^2 \quad (3)$$

$$P = \frac{E}{\Delta t} \quad (4)$$

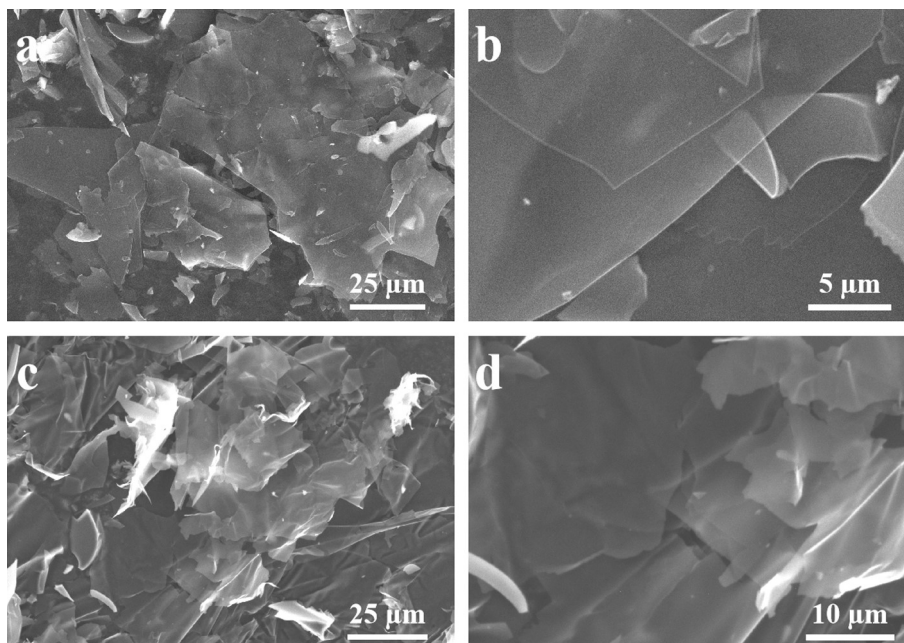

**Fig. S1** (a,b) SEM images of adenosine derived carbon obtained by heating adenosine to 700 °C for 2 h. (c,d) SEM images of pentose derived carbon obtained by heating pentose to 700 °C for 2 h.

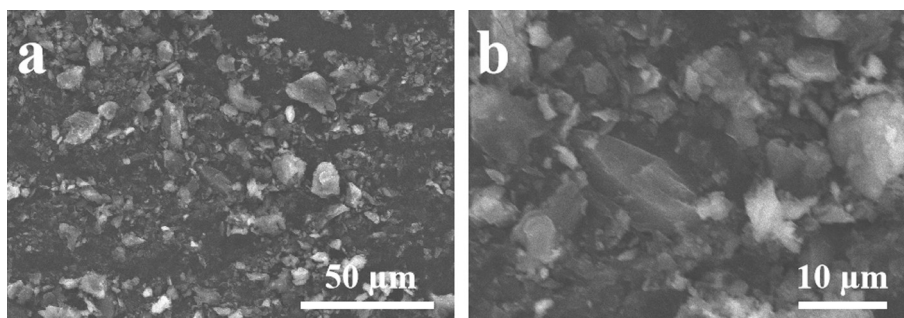

**Fig. S2** SEM images of adenine derived carbon obtained by heating adenine to 700 °C for 2 h.

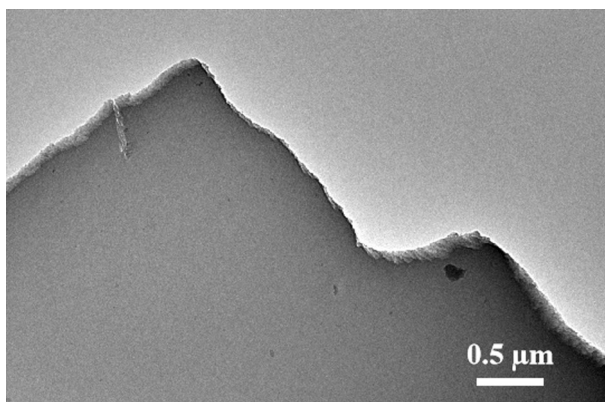

**Fig. S3** TEM image of NPCNS.

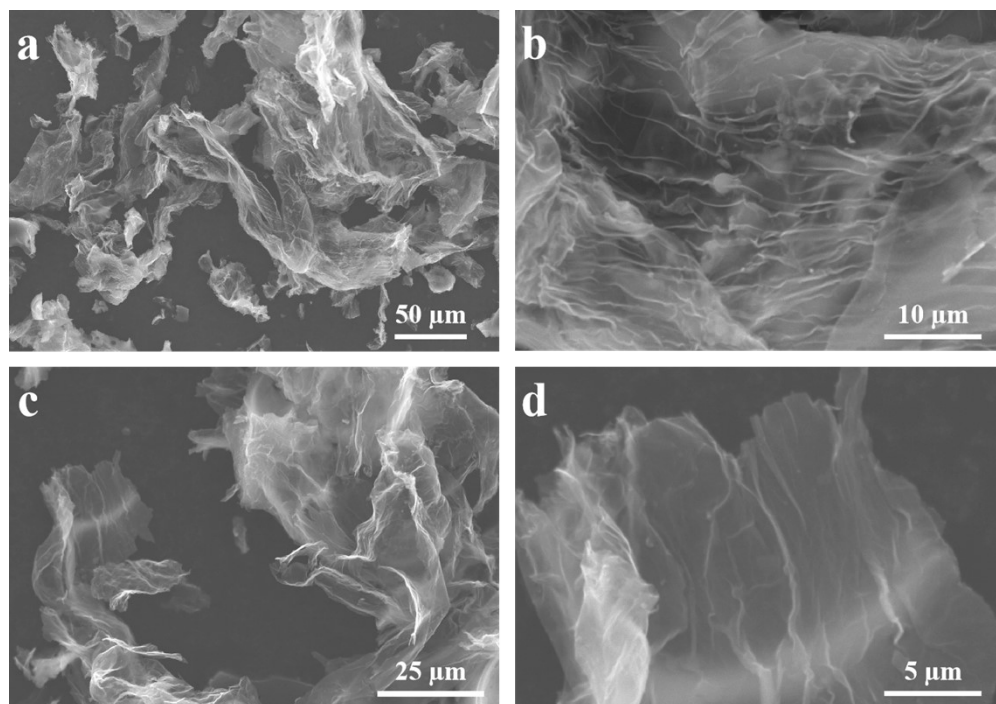

**Fig. S4** SEM images of CNPCNS-700 and CNPCNS-900.

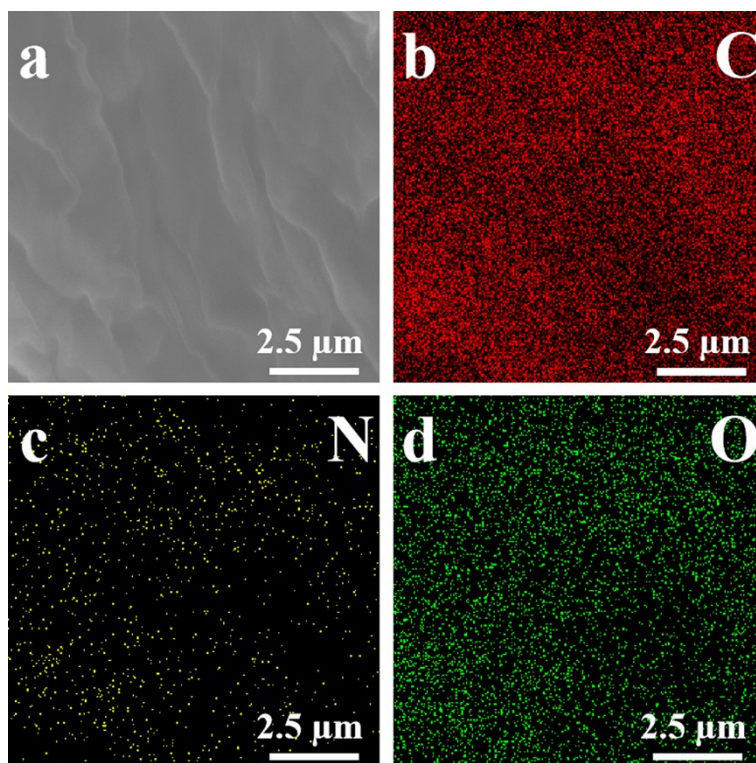

Fig. S5 EDX elemental mapping images of CNPCNS-800.

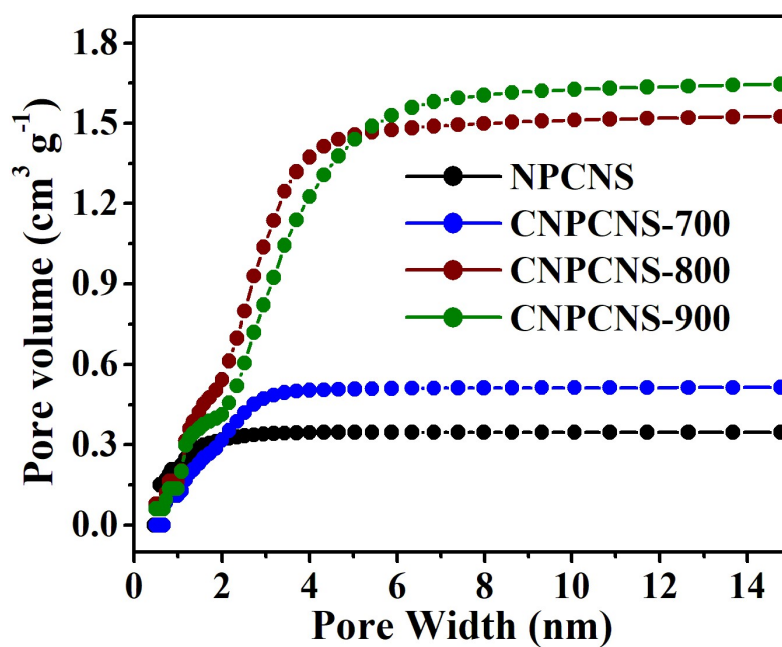

Fig. S6 Cumulative pore volume of NPCNS, CNPCNS-700, CNPCNS-800 and CNPCNS-900.

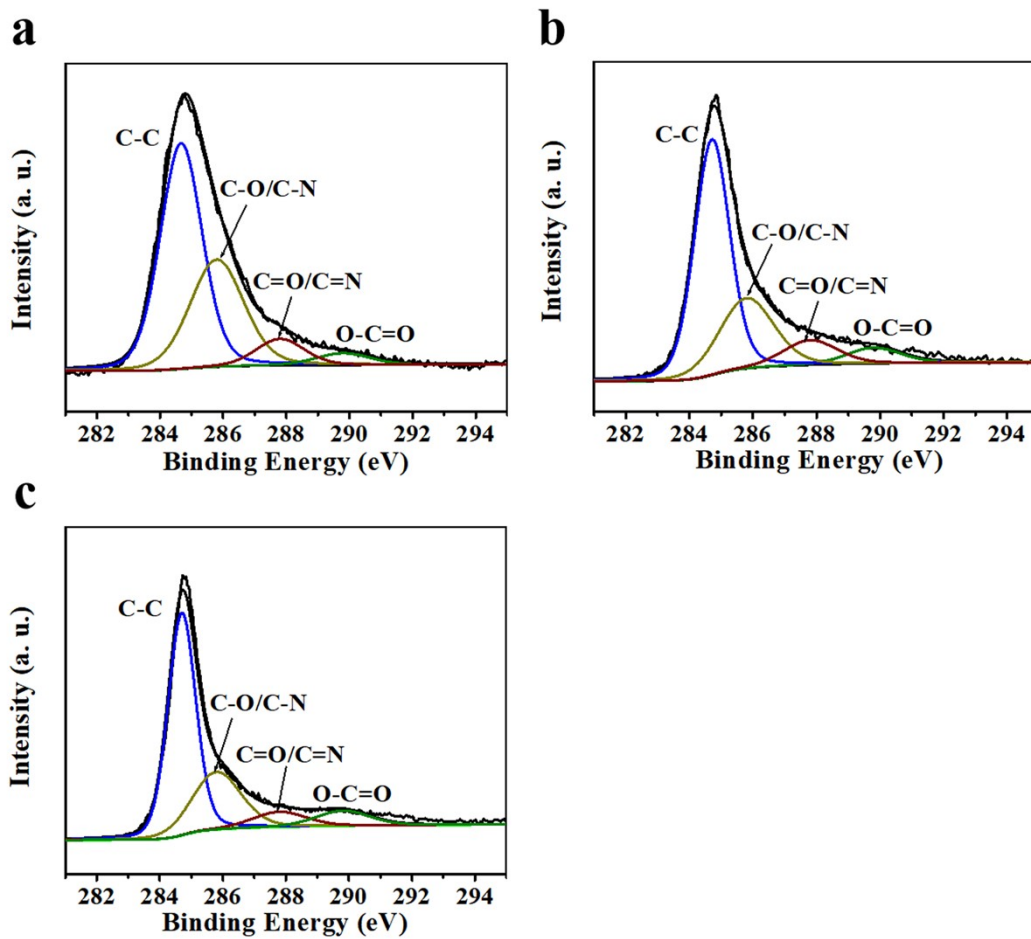

**Fig. S7.** C1s spectrum of (a) NPCNS, (b) CNPCNS-700 and (c) CNPCNS-900.

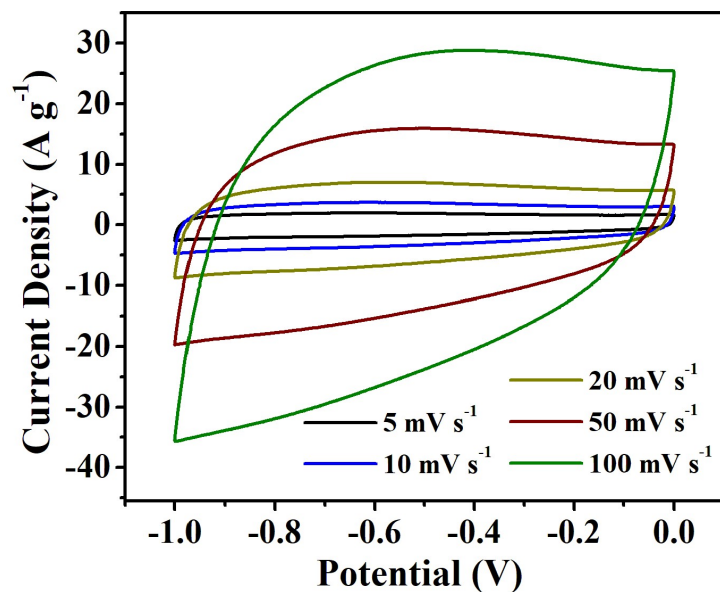

**Fig. S8.** CV curves of CNPCNS-800 electrode at the scan rates from 5 to 100  $\text{mV s}^{-1}$  in the 6 M KOH.

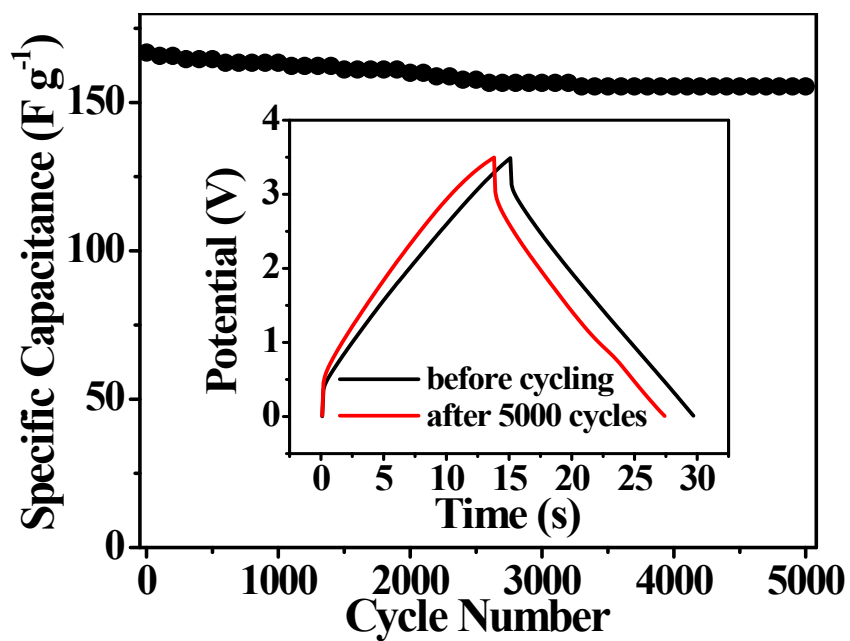

**Fig. S9** The long-term cycling stability of CNPCNS-800 in EMIMBF<sub>4</sub>. The inset of shows the GCD curves before and after 5000 GCD cycles at 10  $\text{A g}^{-1}$ .
